# Supplementary material
Source: PubMed Central journal article supplement (PMC4749423)
Supplement: NIHMS738407-supplement.pdf [file NIHMS738407-supplement.pdf]

**Figure S1, related to Figure 1**

**A**

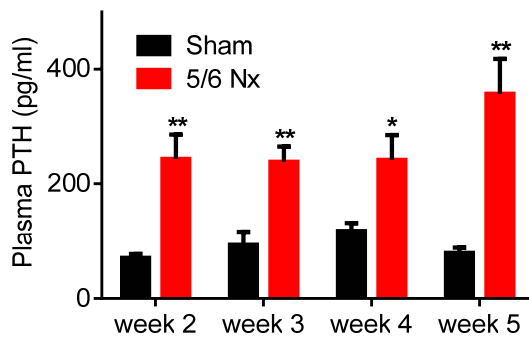

**B**

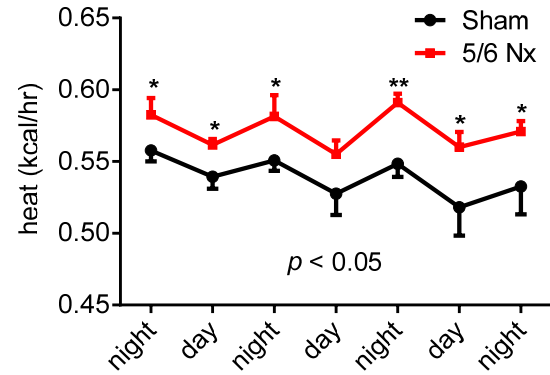

**C**

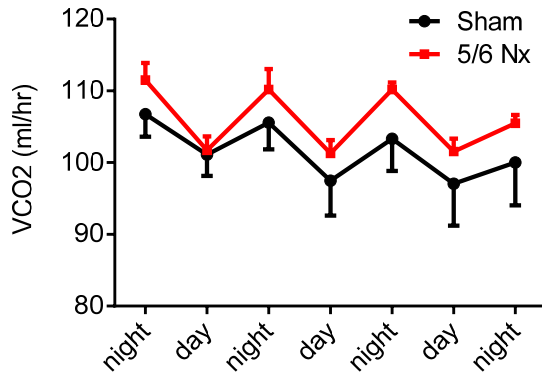

**D**

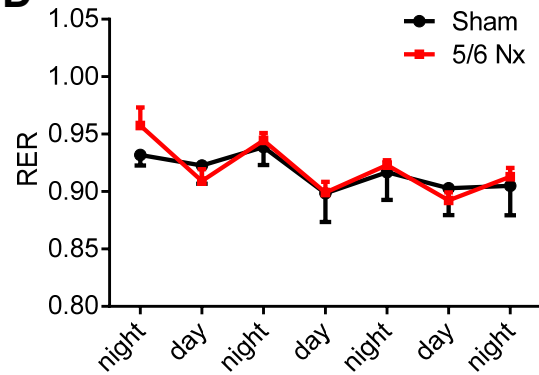

**E**

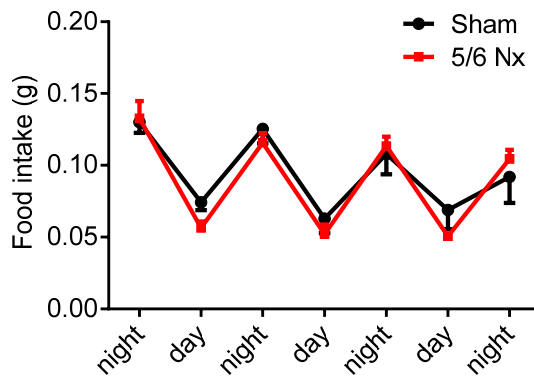

**Figure S2, related to Figure 1**

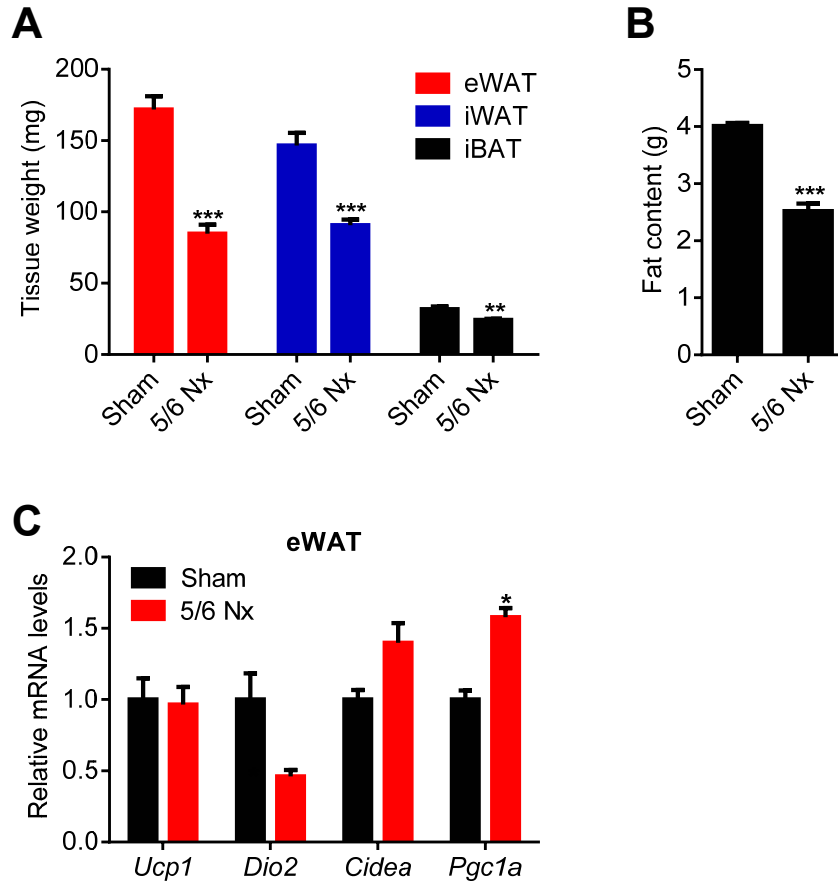

**Figure S3, related to Figure 4**

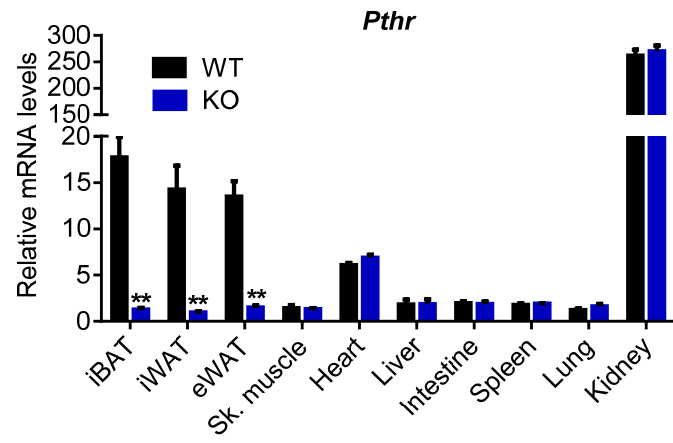

**Figure S4, related to Figure 5**

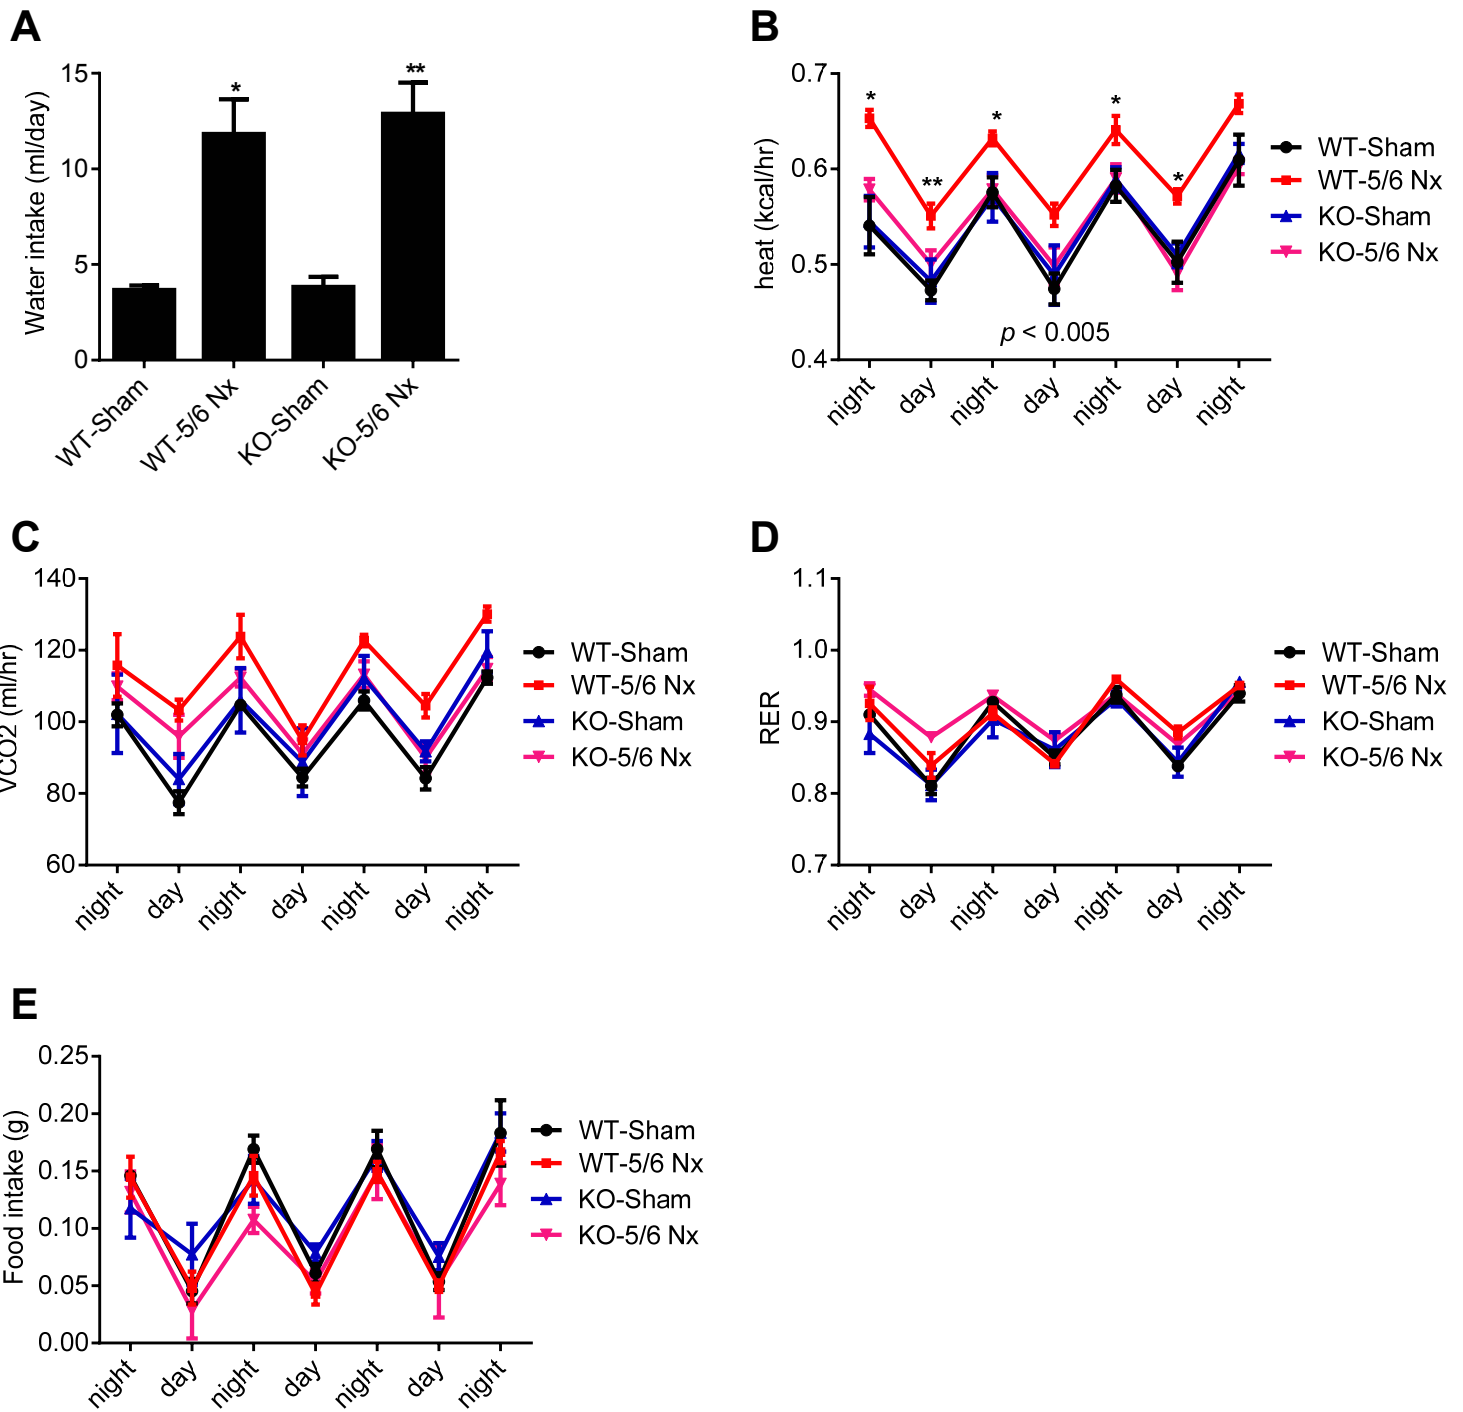

**Figure S5, related to Figure 6**

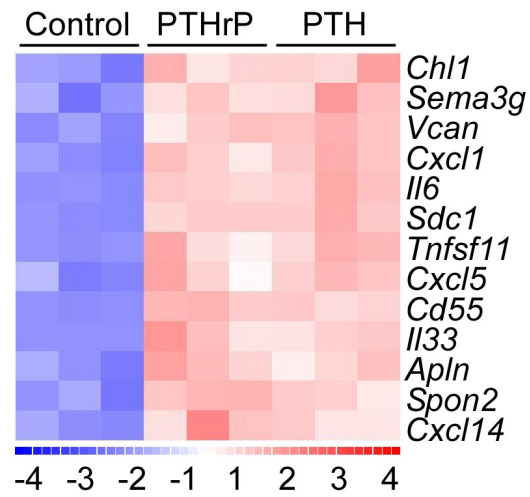

**Figure S6, related to Figure 7**

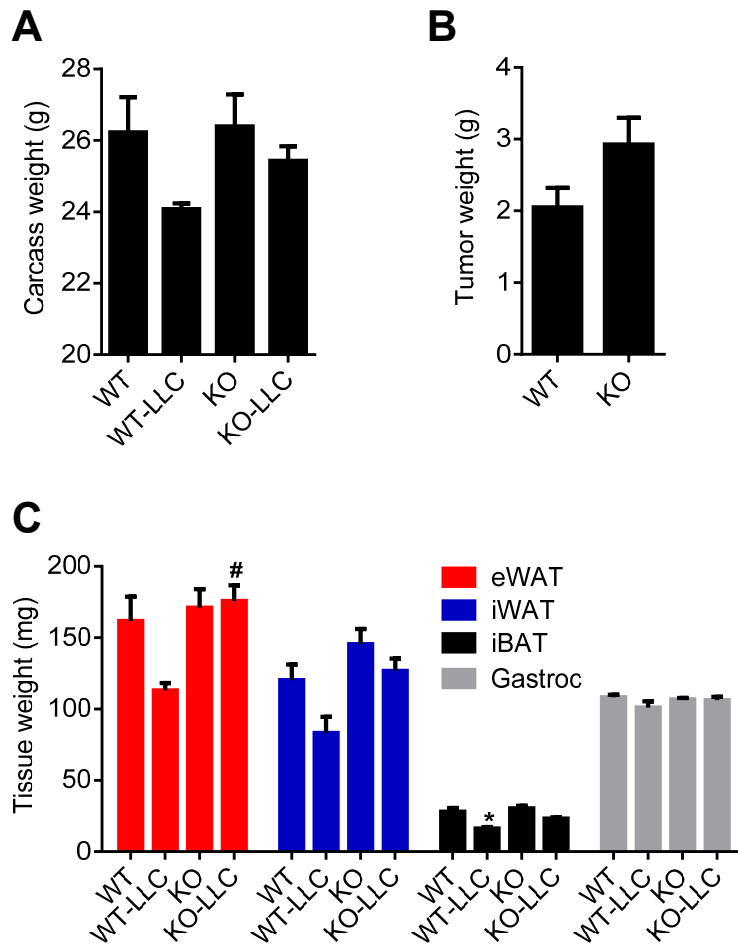

## SUPPLEMENTAL FIGURE AND TABLE LEGENDS

### **Figure S1 (Related to Figure 1). Metabolic parameters of the 5/6 nephrectomized mice**

(A-F) Mice underwent sham or 5/6 nephrectomy surgery and were sacrificed 5 weeks later (n = 5-7). (A) Plasma PTH levels were measured between post-surgery weeks 2-5. They were placed into metabolic cages between post-surgery weeks 2 and 3, when the difference in body weight was small. Their heat generation (B), CO<sub>2</sub> production (VCO<sub>2</sub>) (C), Respiratory Exchange Ratio (RER) (D) and food intake (E) were monitored. The values are mean ± SEM. \**P* < 0.05, \*\**P* < 0.005.

### **Figure S2 (Related to Figure 1). 5/6 nephrectomized mice lose fat mass.**

(A-B) Mice underwent sham or 5/6 nephrectomy surgery and were sacrificed 4 weeks later (n = 6). Fat tissues were dissected and weighed (A). Whole body fat composition was determined by MRI (B).

(C) Mice underwent sham or 5/6 nephrectomy surgery and were sacrificed 5 weeks later (n = 5-7). mRNA levels in eWAT (C) was determined by RT-qPCR. The values are mean ± SEM. \**P* < 0.05, \*\**P* < 0.005, \*\*\**P* < 0.0005.

### **Figure S3 (Related to Figure 4). *Pthr* mRNA levels in an array of tissues from Wild-type and Adipo-PTHR-KO mice**

*Pthr* mRNA expression in various tissues of WT and Adipo-PTHR-KO mice is shown (n = 3). The values are mean ± SEM. \*\**P* < 0.005.

### **Figure S4 (Related to Figure 5). Metabolic parameters of the 5/6 nephrectomized Adipo-PTHR-KO mice**

(A-D) Mice underwent sham or 5/6 nephrectomy surgery and were sacrificed 5 weeks later (n = 5-6). They were placed into metabolic cages between post-surgery weeks 2 and 3, when the

difference in body weight was small. Their water consumption (A), heat generation (B), CO<sub>2</sub> production (VCO<sub>2</sub>) (C), Respiratory Exchange Ratio (RER) (D) and food intake (E) were monitored. The values are mean ± SEM. \**P* < 0.05, \*\**P* < 0.005.

**Figure S5 (Related to Figure 6). Global gene expression analysis of the fat cells treated with PTH and PTHrP**

Primary adipocytes were treated with PTH or PTHrP (100 ng/ml each) for 4 hr. Gene expression heat map of the secreted factors identified in the microarray analysis is shown.

**Figure S6 (Related to Figure 7). Adipo-PTHR-KO mice are resistant to LLC tumor-driven cachexia**

(A-C) Mice inoculated with LLC cells were sacrificed 14 days later (n = 4-5). Carcass weight (calculated by subtracting tumor weight from the total weight) (A) and tumor weight (B) were shown. Fat and muscle tissues were dissected and weighed (C). The values are mean ± SEM. (\*) refers to differences between LLC and non-tumor-bearing groups. (#) refers to differences between WT-LLC and KO-LLC groups. \**P* < 0.05, #*P* < 0.05, ###*P* < 0.005.

**Table S1 (Related to Figure 3). Information on the patient group and their plasma PTH levels**



**Table S1, related to Figure 3**

|    | GENDER | AGE AT SURGERY | DIAGNOSIS                   | Surgery                 | BMI                  | Intraoperative Serum PTH (pg/ml) |                | Serum PTH (pg/ml) |               |
|----|--------|----------------|-----------------------------|-------------------------|----------------------|----------------------------------|----------------|-------------------|---------------|
|    |        |                |                             |                         | (kg/m <sup>2</sup> ) | Prior excision                   | After excision | before surgery    | after surgery |
| 1  | Female | 48             | Benign neoplasm             | right thyroid lobectomy | 36                   | -                                | -              | -                 | -             |
| 2  | Female | 64             | Primary hyperparathyroidism | parathyroidectomy       | 21.5                 | 61                               | 30             | -                 | -             |
| 3  | Female | 68             | Primary hyperparathyroidism | parathyroidectomy       | 20                   | 181                              | 10             | 95                | 38            |
| 4  | Female | 49             | Primary hyperparathyroidism | parathyroidectomy       | 26.5                 | 321                              | 29             | -                 | 99            |
| 5  | Female | 59             | Primary hyperparathyroidism | parathyroidectomy       | 31.8                 | 202                              | 20             | 165               | 31            |
| 6  | Female | 49             | Primary hyperparathyroidism | parathyroidectomy       | 19.8                 | 81                               | 26             | 75                | 30            |
| 7  | Female | 36             | Hurthle cell neoplasm       | Left thyroidectomy      | 21.1                 | -                                | -              | -                 | -             |
| 8  | Female | 44             | Primary hyperparathyroidism | parathyroidectomy       | 28.6                 | 196                              | 30             | 179               | 10            |
| 9  | Female | 46             | Benign neoplasm             | right thyroid lobectomy | 23                   | -                                | -              | -                 | -             |
| 10 | Female | 47             | Primary hyperparathyroidism | parathyroidectomy       | 39.8                 | 166                              | 31             | 166               | 64            |
| 11 | Female | 71             | Primary hyperparathyroidism | parathyroidectomy       | 32.3                 | 129                              | -              | -                 | 34            |
| 12 | Female | 44             | Graves disease              | Total thyroidectomy     | 22.5                 | -                                | -              | -                 | -             |
| 13 | Female | 52             | Benign goiter               | Left thyroidectomy      | 25                   | -                                | -              | -                 | -             |
| 14 | Female | 32             | Benign goiter               | Left thyroidectomy      | 22.5                 | -                                | -              | -                 | -             |
| 15 | Female | 75             | Primary hyperparathyroidism | parathyroidectomy       | 21.3                 | 57                               | 26             | 51                | 24            |
| 16 | Female | 78             | Primary hyperparathyroidism | parathyroidectomy       | 35.3                 | 170                              | 33             | -                 | -             |
| 17 | Female | 46             | Graves disease              | Total thyroidectomy     | 26.5                 | -                                | -              | -                 | -             |
| 18 | Female | 67             | Benign goiter               | Total thyroidectomy     | 34.4                 | -                                | -              | -                 | -             |
| 19 | Female | 53             | Primary hyperparathyroidism | right parathyroidectomy | 18.3                 | 157                              | 35             | -                 | 55            |
| 20 | Female | 45             | Benign goiter               | thyroidectomy           | 30.3                 | -                                | -              | -                 | -             |
| 21 | Male   | 64             | Hurthle-cell neoplasm       | thyroidectomy           | 30.3                 | -                                | -              | -                 | -             |
| 22 | Female | 31             | Benign goiter               | thyroidectomy           | 20.9                 | -                                | -              | -                 | -             |
| 23 | Female | 59             | Primary hyperparathyroidism | parathyroidectomy       | 23.5                 | 60                               | 16             | -                 | 23            |
